# Supplementary material
Source: PubMed Central journal article supplement (PMC7956063)
Supplement: NIHMS1599516-supplement-1.pdf [file NIHMS1599516-supplement-1.pdf]

## Supplemental Materials

Table S1.

*Fit Indices from Different Models Estimated*

|                                       |                                           | <i>(df) <math>\chi^2</math></i> | <i>p</i> | <i>CFI</i> | <i>RMSEA<br/>and 90%<br/>CI</i> | <i>SRMR</i> | <i>BIC</i> | <i><math>\chi^2</math><br/>difference<br/>test</i> | <i>Preferred</i> |
|---------------------------------------|-------------------------------------------|---------------------------------|----------|------------|---------------------------------|-------------|------------|----------------------------------------------------|------------------|
| Internalizing<br>Measurement<br>Model | Internalizing:<br>AR Paths Free           | (2) 16.64                       | .00      | .994       | .082<br>[.049,<br>.120]         | .050        | 27932      | (2) 2.29,<br><i>p</i> = .32                        | No               |
|                                       | Internalizing:<br>AR Paths<br>Constrained | (4) 18.93                       | .00      | .994       | .059<br>[.034,<br>.086]         | .054        | 27921      |                                                    | Yes              |
| Conflict<br>Measurement<br>Model      | Conflict:<br>AR Paths Free                | (2) 15.00                       | .00      | .995       | .077<br>[.044,<br>.116]         | .032        | 23799      | (2) 7.73,<br><i>p</i> = .02                        | Yes              |
|                                       | Conflict:<br>AR Paths<br>Constrained      | (4) 22.73                       | .00      | .993       | .066<br>[.041,<br>.093]         | .043        | 23792      |                                                    | No               |
| RI CLPM<br>RI CLPM                    | Primary Model<br>with no<br>Covariates    | (11) 35.85                      | .00      | .995       | .046<br>[.029,<br>.063]         | .034        | 51352      | (48)<br>45.82, <i>p</i><br>= .56                   | N/A              |
|                                       | Primary Model<br>with<br>Covariates       | (59) 81.67                      | .03      | .995       | .017<br>[.006,<br>.025]         | .022        | 80688      |                                                    | N/A              |
| RI CLPM<br>Group<br>Analysis          | Estimates freely<br>estimated             | (112) 133.50                    | .08      | .996       | .017<br>[.000,<br>.027]         | .028        | 79090      | (64)<br>40.44, <i>p</i><br>= .99                   | No               |
|                                       | Estimates<br>constrained                  | (176) 173.94                    | .53      | 1.000      | .000<br>[.000,<br>.017]         | .038        | 78698      |                                                    | Yes              |

|      |                             |             |     |      |                         |      |       |                              |     |
|------|-----------------------------|-------------|-----|------|-------------------------|------|-------|------------------------------|-----|
| CLPM | One lagged AR paths         | (12) 264.65 | .00 | .942 | .124<br>[.111,<br>.137] | .032 | 81285 | (4)<br>214.27, $p$<br>< .001 | No  |
|      | One and Two lagged AR paths | (8) 50.38   | .00 | .990 | .062<br>[.047,<br>.079] | .008 | 81022 |                              | Yes |

Note. For nested models, a significant ( $p < .05$ ) change in chi-square indicates a decrement in model fit. When non-significant differences emerged, we selected the more parsimonious model. When statistically significant differences emerged, we selected the improved model over the parsimonious one. Comparisons across non-nested models were based on CFI (higher values indicate better fit), RMSEA and BIC (lower values indicate better fit).

Table S2.

*Unstandardized Estimates from RI CLPM for Internalizing and Conflict*

|                  | Internalizing RI    |           |          | Conflict RI    |           |          |
|------------------|---------------------|-----------|----------|----------------|-----------|----------|
|                  | <i>B</i>            | <i>SE</i> | <i>P</i> | <i>B</i>       | <i>SE</i> | <i>P</i> |
| Male             | 0.13                | 0.57      | .823     | -0.36          | 0.30      | .230     |
| Black            | -1.33               | 0.58      | .023     | -1.23          | 0.20      | .000     |
| Hispanic         | -1.10               | 1.23      | .369     | 0.77           | 0.39      | .049     |
| Other            | 1.70                | 2.02      | .402     | -3.10          | 1.25      | .013     |
| Mom Education    | -0.05               | 0.13      | .671     | -0.01          | 0.09      | .916     |
| Mom Vocabulary   | 0.03                | 0.01      | .005     | -0.01          | 0.01      | .684     |
| Mom Depression   | 0.30                | 0.03      | .000     | 0.16           | 0.02      | .000     |
| Family Income    | -0.21               | 0.08      | .010     | -0.07          | 0.07      | .271     |
|                  | Internalizing (T+1) |           |          | Conflict (T+1) |           |          |
| Internalizing G3 | 0.13                | 0.04      | .000     | 0.01           | 0.02      | .498     |
| Conflict G3      | -0.01               | 0.04      | .764     | 0.13           | 0.03      | .000     |
| Internalizing G4 | 0.13                | 0.04      | .000     | -0.01          | 0.02      | .554     |
| Conflict G4      | -0.04               | 0.06      | .572     | 0.08           | 0.03      | .016     |
| Internalizing G5 | 0.13                | 0.04      | .000     | 0.03           | 0.02      | .187     |
| Conflict G5      | -0.06               | 0.04      | .157     | 0.08           | 0.04      | .043     |

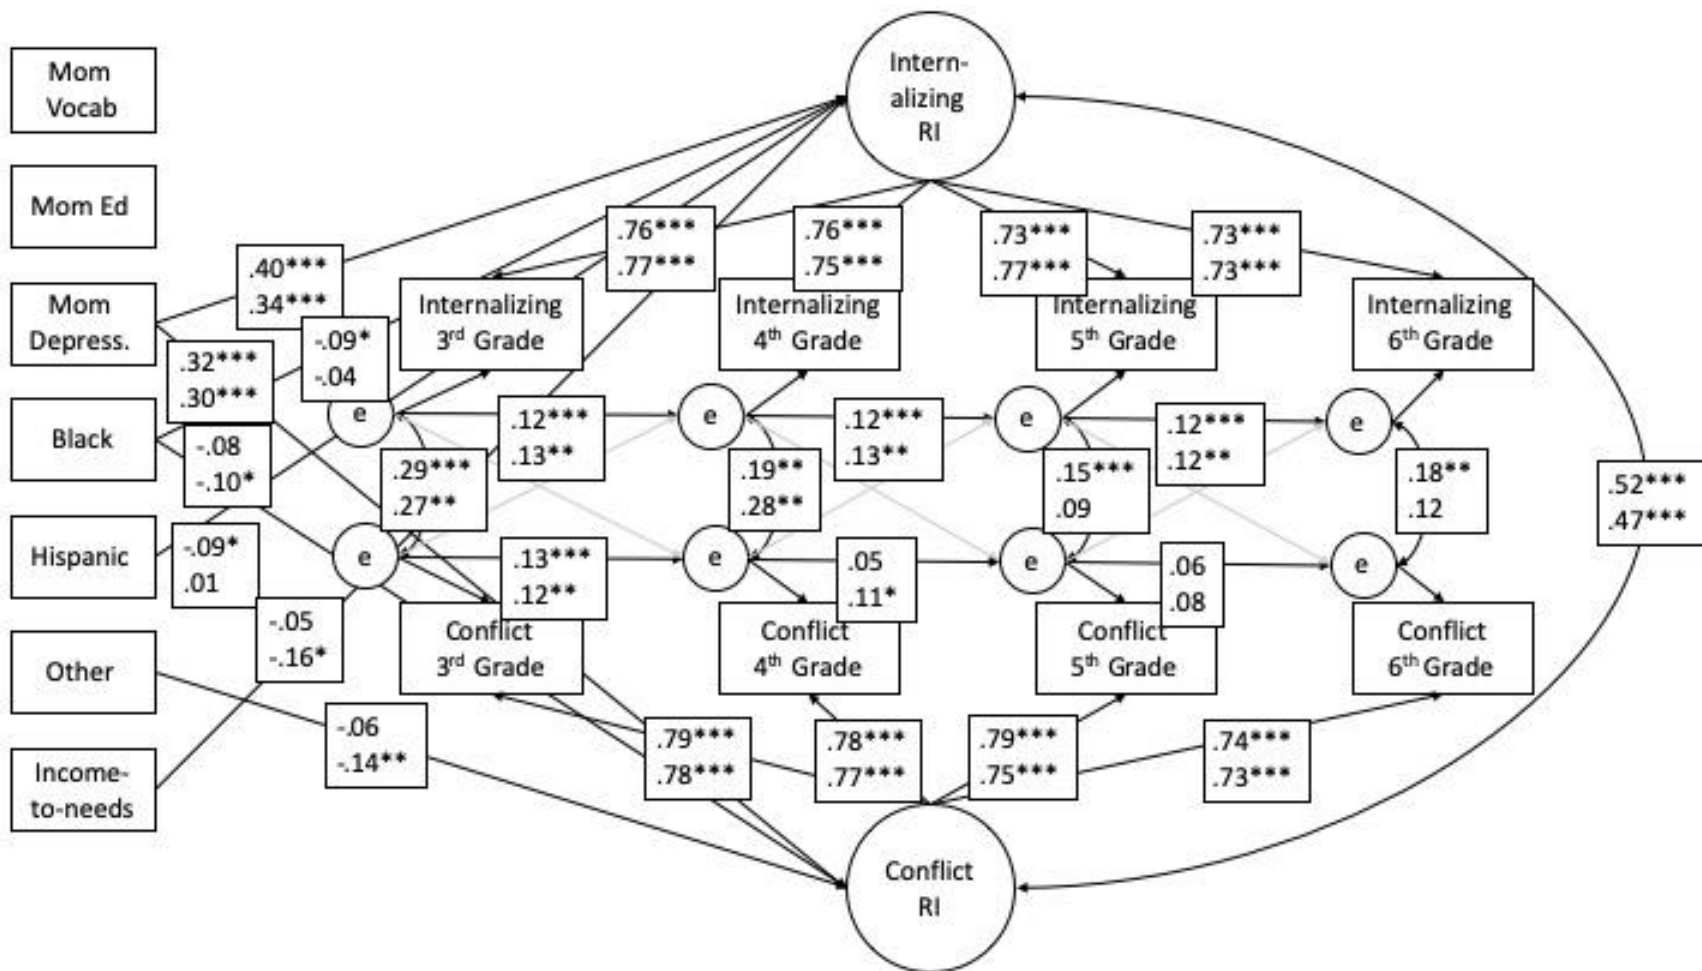

Figure S1. *Random Intercept Cross-Lagged Panel Model for Internalizing and Conflict by Gender.* Female estimates are on the top; male estimates are on the bottom.

\*  $p < .05$ .

\*\*  $p < .01$ .

\*\*\*  $p < .001$ .

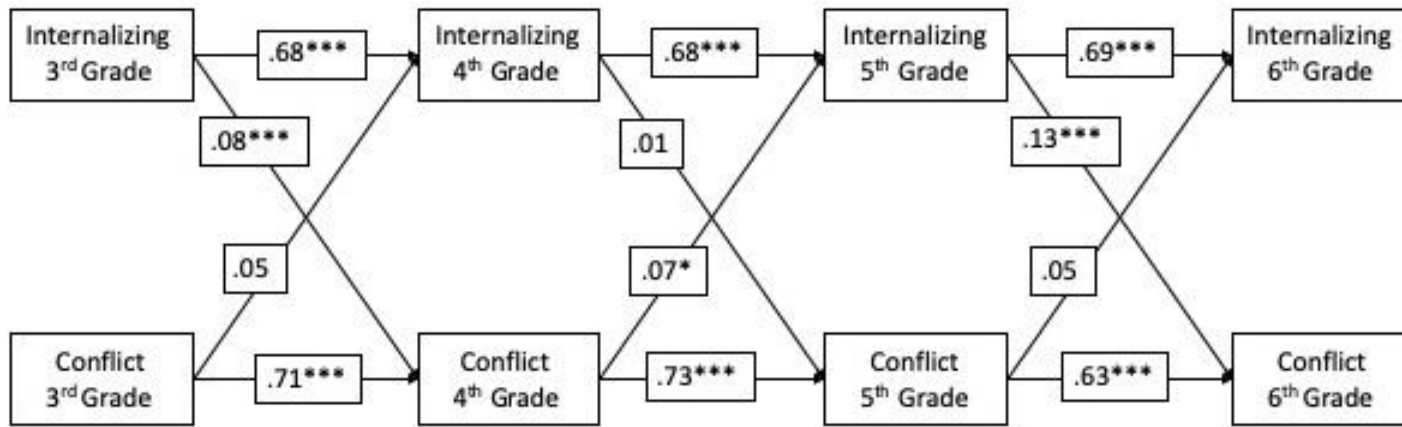

Figure S2. *Cross-Lagged Panel Model for Internalizing and Conflict (Single Lagged Path)*. All covariates included as predictors of each outcome but not shown to reduce clutter.

\*  $p < .05$ .

\*\*  $p < .01$ .

\*\*\*  $p < .001$ .

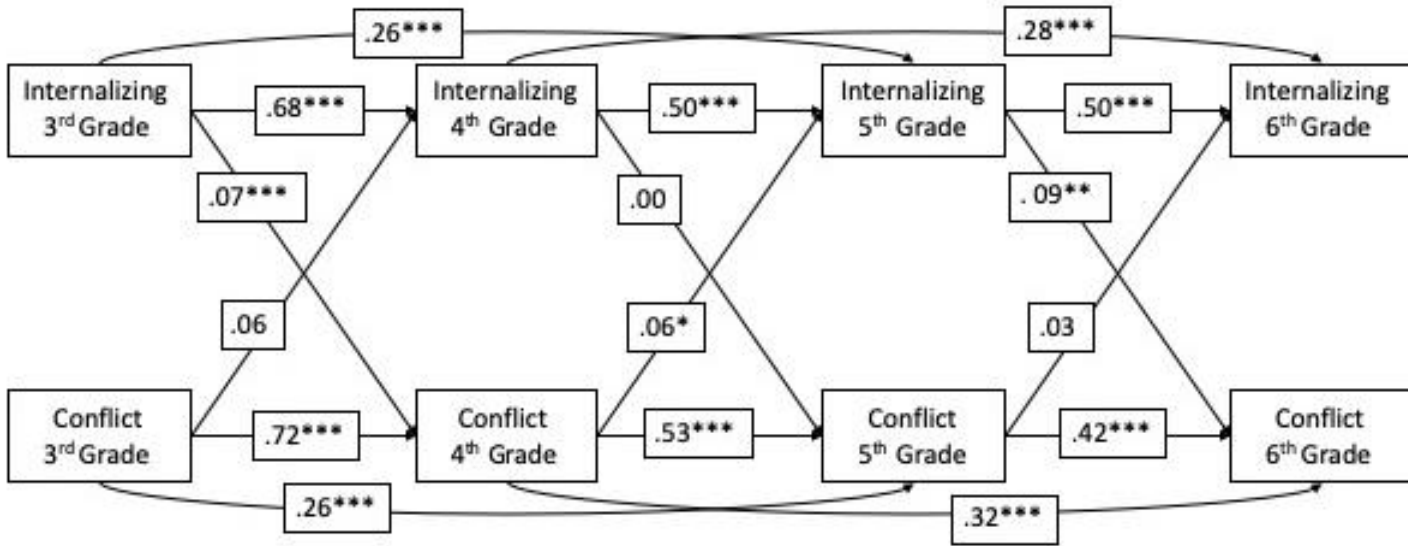

Figure S3. *Cross-Lagged Panel Model for Internalizing and Conflict (Two Lagged Paths)*. All covariates included as predictors of each outcome but not shown to reduce clutter.

\*  $p < .05$ .

\*\*  $p < .01$ .

\*\*\*  $p < .001$ .
